# Supplementary material for: Morphological and evolutionary insights into the keystone element of the human foot’s medial longitudinal arch
Source: Springer Nature journal article supplement (doi:10.1038/s42003-023-05431-8), 2023-10-19
Supplement: MOESM1 [file 42003_2023_5431_MOESM1_ESM.pdf]

## Supplementary Information

### Morphological and evolutionary insights into the keystone element of the human foot's medial longitudinal arch

Rita Sorrentino<sup>1</sup>, Kristian J. Carlson<sup>2,3</sup>, Caley M. Orr<sup>4,5</sup>, Annalisa Pietrobelli<sup>1</sup>, Carla Figus<sup>6</sup>, Shuyuan Li<sup>7</sup>, Michele Conconi<sup>8</sup>, Nicola Sancisi<sup>8</sup>, Claudio Belvedere<sup>9</sup>, Mingjie Zhu<sup>7</sup>, Luca Fiorenza<sup>10</sup>, Jean-Jacques Hublin<sup>11,12</sup>, Tea Jashashvili<sup>2,13</sup>, Mario Novak<sup>14</sup>, Biren A. Patel<sup>2,15</sup>, Thomas C. Prang<sup>16</sup>, Scott A. Williams<sup>3,17,18</sup>, Jaap P. P. Saers<sup>19</sup>, Jay T. Stock<sup>20</sup>, Timothy Ryan<sup>21</sup>, Mark Myerson<sup>7</sup>, Alberto Leardini<sup>9</sup>, Jeremy DeSilva<sup>22</sup>, Damiano Marchi<sup>23,18,\*</sup>, Maria Giovanna Belcastro<sup>1,\*</sup>, Stefano Benazzi<sup>6,\*</sup>

<sup>1</sup>*Department of Biological, Geological and Environmental Sciences, University of Bologna, Bologna 40126, Italy*

<sup>2</sup>*Department of Integrative Anatomical Sciences, Keck School of Medicine, University of Southern California, Los Angeles 90033, USA*

<sup>3</sup>*Evolutionary Studies Institute, University of the Witwatersrand, Johannesburg, WITS 2050, South Africa*

<sup>4</sup>*Department of Cell and Developmental Biology, University of Colorado School of Medicine, Aurora, CO 80045, USA*

<sup>5</sup>*Department of Anthropology, University of Colorado Denver, Denver CO 80217, USA*

<sup>6</sup>*Department of Cultural Heritage, University of Bologna, Ravenna 48121, Italy*

<sup>7</sup>*Department of Orthopaedic Surgery, University of Colorado, Denver, CO, USA*

<sup>8</sup>*Department of Industrial Engineering, Health Sciences and Technologies, Interdepartmental Centre for Industrial Research (HST-ICIR), University of Bologna, Bologna 40136, Italy*

<sup>9</sup>*Laboratory of Movement Analysis and Functional Evaluation of Prostheses, IRCCS Istituto Ortopedico Rizzoli, Bologna, Italy*

<sup>10</sup>*Monash Biomedicine Discovery Institute, Department of Anatomy and Developmental Biology, Monash University, Melbourne, VIC 3800, Australia*

<sup>11</sup>*Chaire Internationale de Paléanthropologie, CIRB (UMR 7241-U1050), Collège de France, Paris, France*

<sup>12</sup>*Max Planck Institute for Evolutionary Anthropology, Leipzig 04103, Germany*

<sup>13</sup>*Department of Geology and Paleontology, Georgian National Museum, Tbilisi 0105, Georgia*

<sup>14</sup>*Centre for Applied Bioanthropology, Institute for Anthropological Research, Zagreb 10000, Croatia*

<sup>15</sup>*Human and Evolutionary Biology Section, Department of Biological Sciences, University of Southern California, Los Angeles 90089, USA*

<sup>16</sup>*Department of Anthropology, Washington University in St. Louis, St. Louis, MO 63130, USA*

<sup>17</sup>*Center for the Study of Human Origins, Department of Anthropology, New York University, New York 10003, USA*

<sup>18</sup>*Centre for the Exploration of the Deep Human Journey, University of the Witwatersrand, Johannesburg, Wits 2050, South Africa*

<sup>19</sup>*Naturalis Biodiversity Center, 2333 CR Leiden, the Netherlands*

<sup>20</sup>*Department of Anthropology, Western University, London, Ontario N6A 3K7, Canada*

<sup>21</sup>*Department of Anthropology, The Pennsylvania State University, State College, PA 16802, USA*

<sup>22</sup>*Department of Anthropology, Dartmouth College, Hanover, NH 03755, USA*

<sup>23</sup>*Department of Biology, University of Pisa, Pisa 56126, Italy*

\*equal contribution.

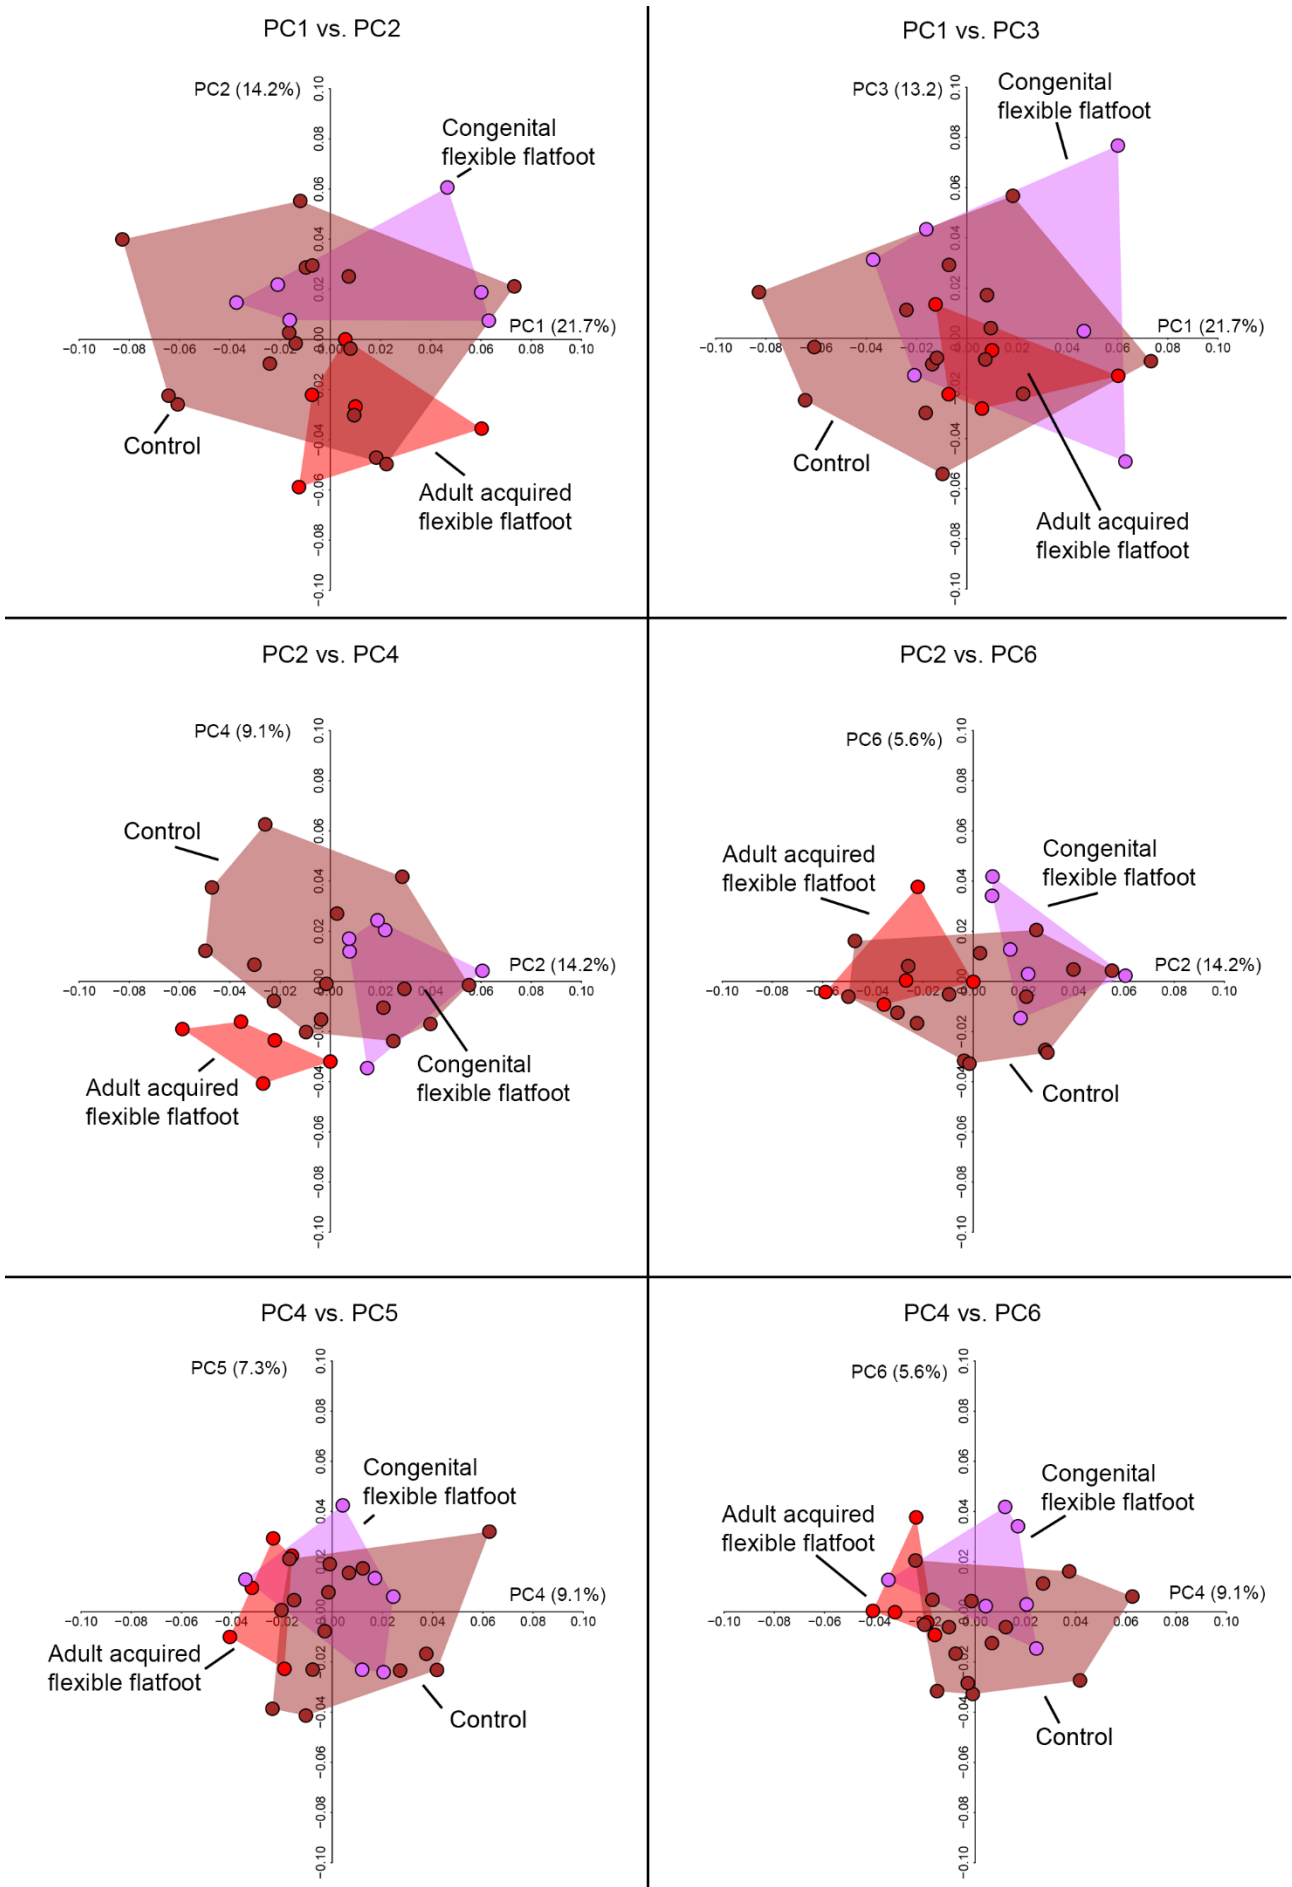

**Fig. S1.** Principal component analysis (PCA). PCA plots showing selected combinations of the first 6 PCs.

Control (in gray) vs. congenital flexible flatfoot (in orange)

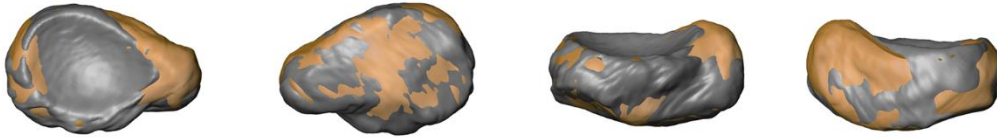

Control (in gray) vs. adult acquired flexible flatfoot (in azure)

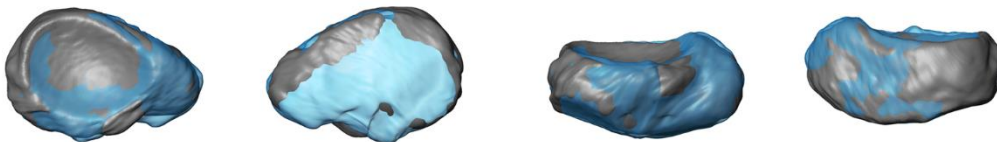

Adult acquired flexible flatfoot (in azure) vs. congenital flexible flatfoot (in orange)

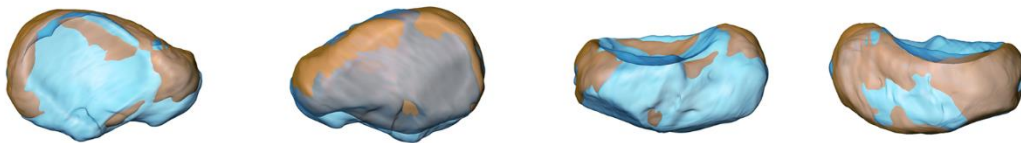

**Fig. S2.** The 3D surface superimposition of means between all possible pairs (i.e., control and congenital flexible flatfoot at the top; control and adult acquired flexible flatfoot at the middle; and congenital flexible flatfoot and adult acquired flexible flatfoot at the bottom). Shapes of naviculars are shown in proximal, distal, plantar, and dorsal views from left to right.

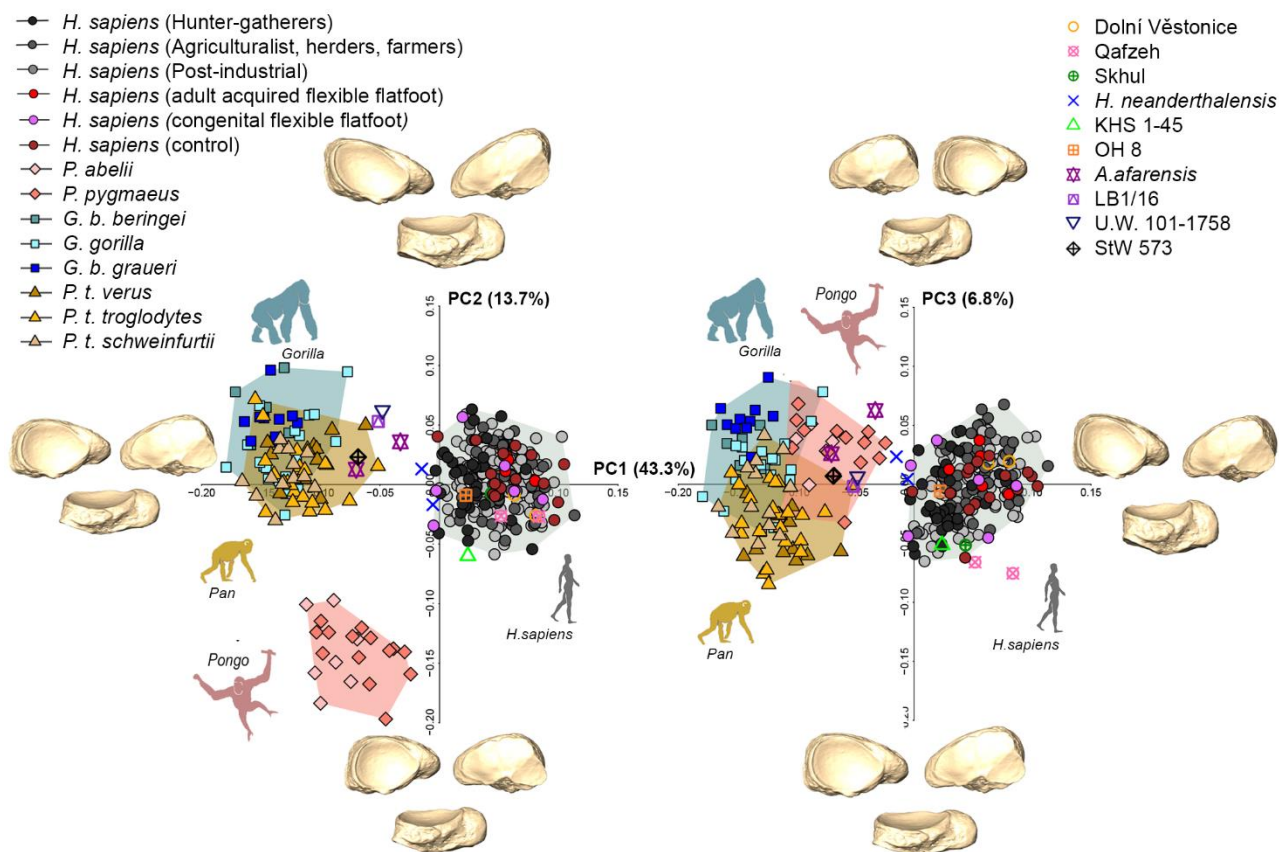

**Fig. S3.** Principal component analysis (PCA). The PCA plot shows PC1 vs. PC2 (left) and PC1 vs. PC3 (right) variance distributions for navicular shapes of great apes (i.e., *Pan*, *Gorilla*, and *Pongo*) and the varied *H. sapiens* groups (i.e., different subsistence activities - hunter-gatherers, agriculturalists, and post-industrial - and clinical classifications - congenital flexible flatfoot, adult-acquired flexible flatfoot, and normal or control). 3D surface renderings representing the extreme negatively and positively loaded shapes of variance along PC 1, 2, 3, and 4 are provided in proximal (top left), distal (top right), and plantar (bottom) views.

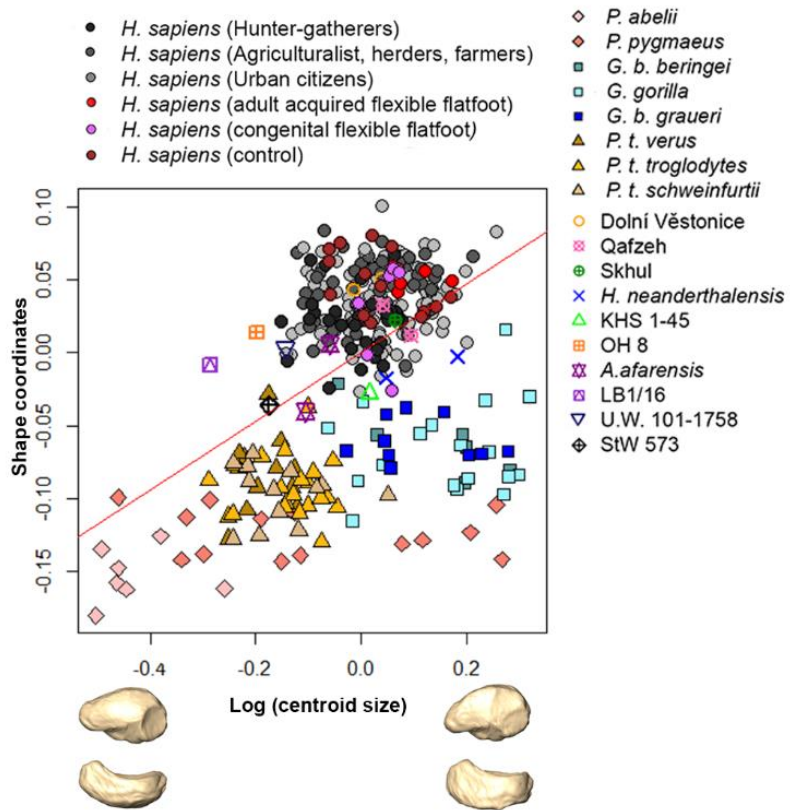

**Fig. S4** – Partial Least squares regression ( $r\text{-PLS} = 0.410$ ,  $p = 0.001$ ) between lnCS and shape coordinates.

**Table S1.** Statistical significance of the principal components (PCs 1-6) of navicular shape variance using Permutation tests among living *H. sapiens* groups clinically classified as congenital flexible flatfoot, adult-acquired flexible flatfoot, and control (no flatfoot diagnosis).

|      | PC1   |       | PC2   |        | PC3   |       | PC4    |        | PC5   |       | PC6    |       |
|------|-------|-------|-------|--------|-------|-------|--------|--------|-------|-------|--------|-------|
|      | CTRL  | CFF   | CTRL  | CFF    | CTRL  | CFF   | CTRL   | CFF    | CTRL  | CFF   | CTRL   | CFF   |
| CFF  | 0.171 |       | 0.165 |        | 0.236 |       | 0.920  |        | 0.463 |       | 0.039* |       |
| AAFF | 0.304 | 0.846 | 0.064 | 0.005* | 0.546 | 0.139 | 0.016* | 0.029* | 0.412 | 0.952 | 0.251  | 0.511 |

\*Significant  $p$ -value ( $p < 0.05$ ).

Abbreviations: CFF, congenital flexible flatfoot; AAFF, adult acquired flexible flatfoot; CTRL, control.

**Table S2.** Means and standard deviation (SD) of lnCS, relative lnCS of different anatomical parts, and the ratios of lnCS of the different anatomical parts and overall navicular of living *H. sapiens* groups.

| Feet n°                     | Control |      | Congenital flexible flatfoot |      | Adult acquired flexible flatfoot |      |
|-----------------------------|---------|------|------------------------------|------|----------------------------------|------|
|                             | (UCSM)  |      | (UCSM)                       |      | (IOR)                            |      |
|                             | 15      |      | 6                            |      | 5                                |      |
| <b>lnCS</b>                 | Mean    | SD   | Mean                         | SD   | Mean                             | SD   |
| Overall navicular           | 4.86    | 0.08 | 4.86                         | 0.03 | 4.92                             | 0.05 |
| Talar facet                 | 4.04    | 0.08 | 4.07                         | 0.05 | 4.11                             | 0.05 |
| Cuneiform facets            | 4.31    | 0.08 | 4.31                         | 0.03 | 4.37                             | 0.04 |
| Tuberosity                  | 3.22    | 0.08 | 3.24                         | 0.08 | 3.32                             | 0.08 |
| <b>Ratio %</b>              |         |      |                              |      |                                  |      |
| Talar facet/ navicular      | 83.21   | 0.78 | 83.80                        | 0.93 | 83.47                            | 0.53 |
| Cuneiform facets/ navicular | 88.68   | 0.58 | 88.71                        | 0.45 | 88.88                            | 0.42 |
| Tuberosity/ navicular       | 66.21   | 0.87 | 66.25                        | 1.31 | 67.55                            | 1.02 |

UCSM = University of Colorado School of Medicine, USA; IOR = Istituto Ortopedico Rizzoli, Italy.

**Table S3.** Statistical significance of the principal components (PCs 1-3) of navicular shape variance using Permutation tests among great apes (i.e., *Pan*, *Gorilla*, and *Pongo*) and *H. sapiens*. The *H. sapiens* group includes living and archaeological *H. sapiens* samples in this study (i.e., different subsistence activities - hunter-gatherers, agriculturalists, post-industrial - and clinical classifications - congenital flexible flatfoot, adult acquired flexible flatfoot, and normal or control).

|                     | PC1                 |            |                | PC2                 |            |                | PC3                 |            |                |
|---------------------|---------------------|------------|----------------|---------------------|------------|----------------|---------------------|------------|----------------|
|                     | <i>Homo sapiens</i> | <i>Pan</i> | <i>Gorilla</i> | <i>Homo sapiens</i> | <i>Pan</i> | <i>Gorilla</i> | <i>Homo sapiens</i> | <i>Pan</i> | <i>Gorilla</i> |
| <i>Pongo</i>        | 0.001*              | 0.028*     | 0.001*         | 0.001*              | 0.001*     | 0.001*         | 0.001*              | 0.001*     | 0.802          |
| <i>Homo sapiens</i> |                     | 0.001*     | 0.001*         |                     | 0.335      | 0.001*         |                     | 0.001*     | 0.001*         |
| <i>Pan</i>          |                     |            | 0.371          |                     |            | 0.006*         |                     |            | 0.001*         |

\*Significant  $p$ -value ( $p < 0.05$ ).

**Table S4.** Means and standard deviation (SD) of lnCS of the different anatomical parts and overall navicular for great apes, *Homo sapiens* (i.e., combined living and archaeological *H. sapiens*), and fossil hominins.

|                       | Overall navicular |      | Talar facet |      | Cuneiform facets |      | Tuberosity |      |
|-----------------------|-------------------|------|-------------|------|------------------|------|------------|------|
|                       | Mean              | SD   | Mean        | SD   | Mean             | SD   | Mean       | SD   |
| <i>Pongo</i>          | 4.61              | 0.26 | 3.87        | 0.25 | 4.1              | 0.25 | 2.73       | 0.30 |
| <i>Pan</i>            | 4.67              | 0.07 | 3.88        | 0.08 | 4.1              | 0.08 | 3.14       | 0.08 |
| <i>Gorilla</i>        | 4.96              | 0.12 | 4.19        | 0.12 | 4.35             | 0.12 | 3.45       | 0.13 |
| <i>Homo sapiens</i>   | 4.85              | 0.08 | 4.06        | 0.09 | 4.29             | 0.08 | 3.18       | 0.11 |
| Dolní Věstonice 15    | 4.81              | -    | 4.00        | -    | 4.28             | -    | 3.16       | -    |
| Dolní Věstonice 16    | 4.86              | -    | 4.03        | -    | 4.31             | -    | 3.21       | -    |
| Qafzeh 8              | 4.91              | -    | 4.17        | -    | 4.42             | -    | 3.19       | -    |
| Qafzeh 9              | 4.86              | -    | 4.11        | -    | 4.37             | -    | 3.13       | -    |
| Skhul 4               | 4.88              | -    | 4.10        | -    | 4.39             | -    | 3.17       | -    |
| Omo Kibish (KHS 1-45) | 4.84              | -    | 4.09        | -    | 4.33             | -    | 3.01       | -    |
| La Ferrassie 1        | 5                 | -    | 4.19        | -    | 4.43             | -    | 3.5        | -    |
| La Ferrassie 2        | 4.87              | -    | 4.08        | -    | 4.35             | -    | 3.18       | -    |
| LB1/16                | 4.53              | -    | 3.76        | -    | 3.95             | -    | 2.97       | -    |
| U.W. 101-1758         | 4.68              | -    | 3.89        | -    | 4.08             | -    | 3.17       | -    |
| OH8                   | 4.62              | -    | 3.83        | -    | 4.05             | -    | 2.96       | -    |
| A.L. 333-36           | 4.76              | -    | 3.96        | -    | 4.10             | -    | 3.34       | -    |
| A.L. 333-47           | 4.71              | -    | 3.92        | -    | 4.11             | -    | 3.23       | -    |
| StW 573               | 4.65              | -    | 3.85        | -    | 4.04             | -    | 3.15       | -    |

**Table S5.** Kruskal-Wallis or ANOVA tests (in parenthesis) and subsequent pairwise tests (Mann-Whitney U or Tukey post hoc) for differences in lnCS and ratios of the different anatomical parts and overall navicular for great apes and *Homo sapiens* (i.e., combined living and archaeological *H. sapiens*).

|                                                                       | <i>H. sapiens</i><br>vs. <i>Gorilla</i> | <i>H. sapiens</i><br>vs. <i>Pan</i> | <i>H. sapiens</i><br>vs. <i>Pongo</i> | <i>Gorilla</i><br>vs. <i>Pan</i> | <i>Gorilla</i> vs.<br><i>Pongo</i> | <i>Pan</i> vs.<br><i>Pongo</i> |
|-----------------------------------------------------------------------|-----------------------------------------|-------------------------------------|---------------------------------------|----------------------------------|------------------------------------|--------------------------------|
| <b>Size</b>                                                           |                                         |                                     |                                       |                                  |                                    |                                |
| Overall navicular<br>(F = 92.59, Df = 3, p < 0.001)                   | <0.001*                                 | <0.001*                             | <0.001*                               | <0.001*                          | <0.001*                            | 0.171                          |
| Talar facet<br>( $\chi^2 = 121.24$ , Df = 3, p < 0.001)               | <0.001*                                 | <0.001*                             | <0.001*                               | <0.001*                          | <0.001*                            | 0.198                          |
| Cuneiform facets<br>( $\chi^2 = 112.17$ , Df = 3, p < 0.001)          | 0.006*                                  | <0.001*                             | <0.001*                               | <0.001*                          | <0.001*                            | 0.364                          |
| Tuberosity<br>( $\chi^2 = 107.31$ , Df = 3, p < 0.001)                | <0.001*                                 | 0.001*                              | <0.001*                               | <0.001*                          | <0.001*                            | <0.001*                        |
| <b>Ratio</b>                                                          |                                         |                                     |                                       |                                  |                                    |                                |
| Navicular/ talar facet<br>(F = 17.9, Df = 3, p < 0.001)               | <0.001*                                 | <0.001*                             | 0.578                                 | <0.001*                          | 0.154                              | <0.001*                        |
| Navicular/ cuneiform facet<br>( $\chi^2 = 88.22$ , Df = 3, p < 0.001) | <0.001*                                 | 0.019*                              | 0.020*                                | 0.824                            | <0.001*                            | <0.001*                        |
| Navicular/ tuberosity<br>( $\chi^2 = 153.09$ , Df = 3, p < 0.001)     | <0.001*                                 | <0.001*                             | <0.001*                               | <0.001*                          | <0.001*                            | <0.001*                        |

\*Significant *p*-value (*p* = < 0.05).



**Table S6.** Means and standard deviations (SD) of the ratios of InCS of the different anatomical parts and overall navicular for great apes, *Homo sapiens* (i.e., combined living and archaeological *H. sapiens*), and fossil hominins.

|                       | Talar facet/<br>navicular |      | Cuneiform facets/<br>navicular |      | Tuberosity/<br>navicular |      |
|-----------------------|---------------------------|------|--------------------------------|------|--------------------------|------|
|                       | Mean                      | SD   | Mean                           | SD   | Mean                     | SD   |
| <i>Pongo</i>          | 84.00                     | 0.93 | 88.9                           | 0.77 | 59.08                    | 3.26 |
| <i>Pan</i>            | 83.23                     | 0.69 | 87.78                          | 0.61 | 67.23                    | 1.12 |
| <i>Gorilla</i>        | 84.43                     | 0.61 | 87.72                          | 0.58 | 69.52                    | 1.46 |
| <i>Homo sapiens</i>   | 83.79                     | 0.76 | 88.51                          | 0.53 | 65.64                    | 1.54 |
| Dolní Věstonice 15    | 83.22                     | -    | 89.09                          | -    | 65.85                    | -    |
| Dolní Věstonice 16    | 82.96                     | -    | 88.67                          | -    | 65.99                    | -    |
| Qafzeh 8              | 84.89                     | -    | 89.94                          | -    | 64.99                    | -    |
| Qafzeh 9              | 84.53                     | -    | 89.95                          | -    | 64.29                    | -    |
| Skhul 4               | 84.03                     | -    | 89.92                          | -    | 64.97                    | -    |
| Omo Kibish (KHS 1-45) | 84.59                     | -    | 89.54                          | -    | 62.31                    | -    |
| La Ferrassie 1        | 83.79                     | -    | 88.57                          | -    | 69.91                    | -    |
| La Ferrassie 2        | 83.76                     | -    | 89.35                          | -    | 65.26                    | -    |
| LB1/16                | 82.92                     | -    | 87.11                          | -    | 65.46                    | -    |
| U.W. 101-1758         | 83.10                     | -    | 87.28                          | -    | 67.79                    | -    |
| OH8                   | 82.85                     | -    | 87.74                          | -    | 64.09                    | -    |
| A.L. 333-36           | 83.28                     | -    | 86.22                          | -    | 70.07                    | -    |
| A.L. 333-47           | 83.23                     | -    | 87.25                          | -    | 68.56                    | -    |
| StW 573               | 82.97                     | -    | 87.00                          | -    | 67.79                    | -    |

**Table S7.** Statistical significance of the principal components (PCs 1-6) of navicular shape variance using Permutation tests among different living and archaeological *H. sapiens* groups (i.e., different subsistence activities - hunter-gatherers, agriculturalists, post-industrial - and clinical classifications - congenital flexible flatfoot, adult acquired flexible flatfoot, and normal or control).

|            |                                   | Control | Congenital flexible fatfoot | Hunter-gatherers | Agriculturalist, herders, farmers | Adult acquired flexible flatfoot |
|------------|-----------------------------------|---------|-----------------------------|------------------|-----------------------------------|----------------------------------|
| <b>PC1</b> | Congenital flexible fatfoot       | 0.167   |                             |                  |                                   |                                  |
|            | Hunter-gatherers                  | 0.001*  | 0.483                       |                  |                                   |                                  |
|            | Agriculturalist, herders, farmers | 0.351   | 0.336                       | 0.001*           |                                   |                                  |
|            | Adult acquired flexible flatfoot  | 0.781   | 0.169                       | 0.015*           | 0.394                             |                                  |
|            | Post-industrial                   | 0.109   | 0.529                       | 0.003*           | 0.329                             | 0.201                            |
| <b>PC2</b> | Congenital flexible fatfoot       | 0.853   |                             |                  |                                   |                                  |
|            | Hunter-gatherers                  | 0.928   | 0.901                       |                  |                                   |                                  |
|            | Agriculturalist, herders, farmers | 0.182   | 0.268                       | 0.064            |                                   |                                  |
|            | Adult acquired flexible flatfoot  | 0.038*  | 0.056                       | 0.023*           | 0.162                             |                                  |
|            | Post-industrial                   | 0.609   | 0.571                       | 0.372            | 0.148                             | 0.051                            |
| <b>PC3</b> | Congenital flexible fatfoot       | 0.298   |                             |                  |                                   |                                  |
|            | Hunter-gatherers                  | 0.031*  | 0.655                       |                  |                                   |                                  |
|            | Agriculturalist, herders, farmers | 0.020*  | 0.714                       | 0.940            |                                   |                                  |
|            | Adult acquired flexible flatfoot  | 0.466   | 0.142                       | 0.029*           | 0.028*                            |                                  |
|            | Post-industrial                   | 0.136   | 0.837                       | 0.162            | 0.115                             | 0.080                            |
| <b>PC4</b> | Congenital flexible fatfoot       | 0.100   |                             |                  |                                   |                                  |
|            | Hunter-gatherers                  | 0.009*  | 0.881                       |                  |                                   |                                  |
|            | Agriculturalist, herders, farmers | 0.444   | 0.026*                      | 0.001*           |                                   |                                  |
|            | Adult acquired flexible flatfoot  | 0.517   | 0.081                       | 0.023*           | 0.811                             |                                  |
|            | Post-industrial                   | 0.951   | 0.080                       | 0.001*           | 0.123                             | 0.421                            |
| <b>PC5</b> | Congenital flexible fatfoot       | 0.047*  |                             |                  |                                   |                                  |
|            | Hunter-gatherers                  | 0.965   | 0.026*                      |                  |                                   |                                  |
|            | Agriculturalist, herders, farmers | 0.016*  | 0.540                       | 0.001*           |                                   |                                  |
|            | Adult acquired flexible flatfoot  | 0.165   | 0.676                       | 0.134            | 0.990                             |                                  |
|            | Post-industrial                   | 0.002*  | 0.628                       | 0.001*           | 0.695                             | 0.892                            |
| <b>PC6</b> | Congenital flexible fatfoot       | 0.777   |                             |                  |                                   |                                  |
|            | Hunter-gatherers                  | 0.003*  | 0.007*                      |                  |                                   |                                  |
|            | Agriculturalist, herders, farmers | 0.023*  | 0.056                       | 0.171            |                                   |                                  |
|            | Adult acquired flexible flatfoot  | 0.032*  | 0.042*                      | 0.775            | 0.340                             |                                  |
|            | Post-industrial                   | 0.005*  | 0.027*                      | 0.458            | 0.371                             | 0.516                            |

\*Significant  $p$ -value ( $p < 0.05$ ).

**Table S8.** Extant comparative sample.

| Species                               | Sex     |       |         | Total | Institution/Collection                   |
|---------------------------------------|---------|-------|---------|-------|------------------------------------------|
|                                       | Females | Males | Unknown |       |                                          |
| <i>Homo sapiens</i>                   | 89      | 105   | 61      | 255   | see Supplementary Table 5                |
| <i>Pan troglodytes verus</i>          | 5       | 6     | -       | 11    | AMNH, USNM                               |
| <i>Pan troglodytes troglodytes</i>    | 9       | 10    | 3       | 22    | AMNH, USNM                               |
| <i>Pan troglodytes schweinfurthii</i> | 3       | 5     | 5       | 13    | AMNH, USNM, NMNHP, Gombe, Tervuren       |
| <i>Gorilla beringei beringei</i>      | 2       | 4     | -       | 6     | AMNH, USNM                               |
| <i>Gorilla beringei graueri</i>       | 6       | 3     | 1       | 10    | NMNHP, Tervuren                          |
| <i>Gorilla gorilla</i>                | 7       | 5     | 7       | 19    | AMNH, USNM, DAUC, NMNHP, Gombe, Tervuren |
| <i>Pongo abelii</i>                   | 6       | 1     | -       | 7     | USNM                                     |
| <i>Pongo pygmaeus</i>                 | 5       | 4     | 5       | 14    | USNM, DAUC                               |

AMNH - American Museum of Natural History, New York, NY, USA; USNM - National Museum of Natural History, Smithsonian Institution, Division of Mammals, Washington, D.C., USA; NMNHP, Primate Collection of the Department of Comparative Anatomy of the National Museum of Natural History, Paris, France; Gombe - the primate collection of the University of Minnesota from the Gombe Chimpanzee Research Project, Minneapolis, MN, USA; Tervuren - the Royal Museum for Central Africa, Tervuren, Belgium; DAUC - Duckworth Laboratory, Department of Archaeology, University of Cambridge, UK.

**Table S9.** Composition of the living and archaeological *H. sapiens* sample.

| <b>Population</b>                           | <b>Chronology</b>                     | <b>Subsistence</b>                                   | <b>Sex</b>    | <b>Total</b> | <b>Institution/<br/>Collection<sup>b</sup></b> |
|---------------------------------------------|---------------------------------------|------------------------------------------------------|---------------|--------------|------------------------------------------------|
| <b>Living <i>H. sapiens</i></b>             |                                       |                                                      |               |              |                                                |
| Control (well-developed longitudinal arch)  | 21st century                          | urban labors and specializations                     | 10Fs, 5Ms     | 15           | UCSM                                           |
| Congenital flexible flatfoot                | 21st century                          | urban labors and specializations                     | 3Fs, 3Ms      | 6            | UCSM                                           |
| Adult acquired flexible flatfoot            | 21st century                          | urban labors and specializations                     | 4Fs, 1M       | 5            | IOR                                            |
| <b>Archaeological <i>H. sapiens</i></b>     |                                       |                                                      |               |              |                                                |
| Bologna (Italy)                             | 20th century                          | agrarian, maritime, urban labors and specializations | 24Fs, 25 Ms   | 49           | UniBO - BiGeA, Certosa Collection              |
| Sassari (Italy)                             | 20th century                          | agrarian, maritime, urban labors and specializations | 20 Fs, 22Ms   | 42           | UniBO - BiGeA Frassetto Collection             |
| South Africa                                | 19th-20th centuries                   | urban labors and specializations                     | 4Fs, 13Ms     | 17           | Dart Collection                                |
| Via Orfeo, Bologna (Italy; Jewish Cemetery) | 14th-16th century                     | urban (bankers, traders, artisans)                   | 10Fs, 14Ms    | 24           | UniBO - BiGeA                                  |
| Roccapelago, Modena (Italy)                 | 17th-18th century                     | Herders, mountain dwellers                           | 24U           | 24           | UniBO - DBC                                    |
| Suasa, Ancona (Italy)                       | 1st -3rd century                      | Farmers                                              | 9Fs, 10Ms, 4U | 23           | UniBO - BiGeA                                  |
| Olmo di Nogara, Verona (Italy)              | Bronze Age, 1750-1300 BC              | Herders, agriculturalists                            | 5U            | 5            | UniPI                                          |
| Beli Manastir (Croatia)                     | Eneolithic, 3000-2200 BC              | Herder, agriculturalist                              | 1M            | 1            | IAR                                            |
| Osijek, Beli Manastir (Croatian sites)      | Early/Middle Neolithic, 6000-5000 BC  | Agro-pastoralists                                    | 3Fs, 6Ms      | 9            | IAR                                            |
| Al Khiday (Central-Sudan)                   | Middle Mesolithic, 7050 - 6400 cal BC | Hunter-gatherers and fishing                         | 10U           | 10           | UniPD Al-Khiday collection                     |
| Bloemfontein, Iziko (South Africa)          | Late Stone Age, 11250 - 3040 BP       | Hunter-gatherers                                     | 2Fs, 5Ms, 18U | 25           | NMB                                            |

UCSM - University of Colorado School of Medicine, USA; IOR - Istituto Ortopedico Rizzoli, Italy; UniBO – BiGeA - University of Bologna, Department of Biological, Geological and Environmental Sciences, Italy; UniBO – DBC - University of Bologna, Department of Cultural Heritage, Italy; Dart Collection - University of the Witwatersrand, Johannesburg, South Africa; UniPI - University of Pisa, Department of Biology, Italy; IAR - Centre for Applied Bioanthropology, Institute for Anthropological Research, Zagreb, Croatia; UniPD - Università degli Studi di Padova, Museo di Antropologia, Italy; NMB - Florisband Quaternary Research Station of the National Museum of Bloemfontein, South Africa. F – female; M – male; U – unknown.

**Table S10.** Fossil sample.

| <b>Fossils</b>          | <b>Taxonomy</b>                                                            | <b>Age</b>      | <b>Institution/Collection</b>                                                | <b>References</b>                                                                                                  |
|-------------------------|----------------------------------------------------------------------------|-----------------|------------------------------------------------------------------------------|--------------------------------------------------------------------------------------------------------------------|
| Dolní Věstonice 15      | Upper Pleistocene<br><i>Homo sapiens</i>                                   | ~31 ka cal BP   | Institute of Archeology Brno                                                 | Fewlass et al. 2019 <sup>1</sup> ;<br>Formicola et al., 2001 <sup>2</sup>                                          |
| Dolní Věstonice 16      | Upper Pleistocene<br><i>Homo sapiens</i>                                   | ~31 ka cal BP   | Institute of Archeology Brno                                                 | Fewlass et al. 2019 <sup>1</sup> ;<br>Formicola et al., 2001 <sup>2</sup>                                          |
| Qafzeh 8                | late Middle Pleistocene/<br>early Upper Pleistocene<br><i>Homo sapiens</i> | ~92ka - <115 ka | University Tel Aviv                                                          | Schwarcz et al. 1988 <sup>3</sup> ;<br>Vandermeersch & Bar-Yosef, 2019 <sup>4</sup>                                |
| Qafzeh 9                | late Middle Pleistocene/<br>early Upper Pleistocene<br><i>Homo sapiens</i> | ~92ka - <115 ka | University Tel Aviv                                                          | Schwarcz et al. 1988 <sup>3</sup> ;<br>Vandermeersch & Bar-Yosef, 2019 <sup>4</sup>                                |
| Skhul 4                 | late Middle Pleistocene/<br>early Upper Pleistocene<br><i>Homo sapiens</i> | ~100-130 ka     | Rockefeller Museum Jerusalem                                                 | Grün et al. 2005 <sup>5</sup>                                                                                      |
| KHS 1-45 (Omo-Kibish 1) | late Middle Pleistocene/<br>early Upper Pleistocene<br><i>Homo sapiens</i> | 195 ka          | Ethiopian Authority for<br>Research and Conservation of<br>Cultural Heritage | Pearson et al., 2008 <sup>6</sup> ;<br>DeSilva et al., 2019 <sup>7</sup>                                           |
| La Ferrassie 1          | <i>H. neanderthalensis</i>                                                 | 40 - 54 ka      | National History Museum<br>Paris, Anthropology Collection                    | Guérin, et al. 2015 <sup>8</sup>                                                                                   |
| La Ferrassie 2          | <i>H. neanderthalensis</i>                                                 | 40 - 54 ka      | National History Museum<br>Paris, Anthropology Collection                    | Guérin, et al. 2015 <sup>8</sup>                                                                                   |
| LB1/16                  | <i>Homo floresiensis</i>                                                   | 60 ka           | The National Research Centre<br>for Archaeology, Indonesia                   | Jungers et al., 2009 <sup>9</sup> ;<br>Prang, 2016 <sup>10</sup> ; DeSilva et al., 2019 <sup>7</sup>               |
| U.W. 101-1758           | <i>Homo naledi</i>                                                         | 240–340 ka      | University of the<br>Witwatersrand                                           | Harcourt-Smith et al., 2015 <sup>11</sup> ; DeSilva et al., 2019 <sup>7</sup>                                      |
| OH 8                    | <i>Homo habilis</i> /<br><i>Paranthropus boisei</i> ?                      | 1.85 Ma         | National Museum of Tanzania                                                  | Sarmiento & Marcus, 2000 <sup>12</sup> ; Prang, 2016;<br>DeSilva et al., 2019                                      |
| A.L. 333-36             | <i>Australopithecus afarensis</i>                                          | 3.2 Ma          | Ethiopian Authority for<br>Research and Conservation of<br>Cultural Heritage | Sarmiento & Marcus, 2000 <sup>1</sup> ; Prang, 2016 <sup>7</sup> ;<br>DeSilva et al., 2019 <sup>7</sup>            |
| A.L. 333-47             | <i>Australopithecus afarensis</i>                                          | 3.2 Ma          | Ethiopian Authority for<br>Research and Conservation of<br>Cultural Heritage | Sarmiento & Marcus, 2000 <sup>1</sup> ; Prang, 2016 <sup>7</sup> ;<br>DeSilva et al., 2019 <sup>7</sup>            |
| StW 573                 | <i>Australopithecus prometheus</i>                                         | 3.67 Ma         | University of the<br>Witwatersrand                                           | Clarke & Tobias, 1995 <sup>13</sup> ;<br>Granger et al., 2015 <sup>14</sup> ;<br>DeSilva et al., 2019 <sup>7</sup> |

**Table S11.** Landmarks and semi-landmarks of the navicular template.

| <b>Landmarks</b> | <b>Definition</b>                                                                 |  |
|------------------|-----------------------------------------------------------------------------------|--|
| <b>1</b>         | Most medial point of the talar facet                                              |  |
| <b>2</b>         | Most plantar point of margin separating medial and intermediate cuneiform facets  |  |
| <b>3</b>         | Most plantar point of margin separating lateral and intermediate cuneiform facets |  |
| <b>4</b>         | Most dorsal point of margin separating lateral and intermediate cuneiform facets  |  |
| <b>5</b>         | Most dorsal point of margin separating medial and intermediate cuneiform facets   |  |

  

| <b>Curves</b>  | <b>Definition</b>                                                   | <b>Number of semi-landmarks</b> |
|----------------|---------------------------------------------------------------------|---------------------------------|
| <b>1-&gt;1</b> | Outline of the talar facet                                          | 19                              |
| <b>2-&gt;3</b> | Plantar margin of the intermediate cuneiform facet                  | 1                               |
| <b>2-&gt;5</b> | Dorsal, medial, and plantar margins of the medial cuneiform facet   | 9                               |
| <b>5-&gt;2</b> | Margin separating medial and intermediate cuneiform facets          | 3                               |
| <b>5-&gt;4</b> | Dorsal margin of the intermediate cuneiform facet                   | 4                               |
| <b>4-&gt;3</b> | Margin separating lateral and intermediate cuneiform facets         | 3                               |
| <b>3-&gt;4</b> | Dorsal, lateral, and plantar margins of the lateral cuneiform facet | 7                               |

  

| <b>Surfaces</b>                           | <b>Number of semi-landmarks</b> |
|-------------------------------------------|---------------------------------|
| <b>Talar facet</b>                        | 11                              |
| <b>Medial cuneiform facet</b>             | 5                               |
| <b>Intermediate cuneiform facet</b>       | 3                               |
| <b>Lateral cuneiform facet</b>            | 3                               |
| <b>Tuberosity (non-articular surface)</b> | 12                              |

## Supplementary References

1. Fewlass, H. *et al.* Direct radiocarbon dates of mid Upper Palaeolithic human remains from Dolní Věstonice II and Pavlov I, Czech Republic. *J. Archaeol. Sci. Reports* **27**, 102000 (2019).
2. Formicola, V., Pontrandolfi, A. & Svoboda, J. The upper paleolithic triple burial of Dolní Věstonice: Pathology and funerary behavior. *Am. J. Phys. Anthropol.* **115**, 372–379 (2001).
3. Schwarcz, H. P., *et al.* ESR dates for the hominid burial site of Qafzeh in Israel. *J. Hum. Evol.* **17**, 733-737 (1988).
4. Vandermeersch, B., & Bar-Yosef, O. The paleolithic burials at Qafzeh cave, Israel. *PALEO. Revue d'archéologie préhistorique* **30-1**, 256-275 (2019).
5. Grün, R., *et al.* U-series and ESR analyses of bones and teeth relating to the human burials from Skhul. *J. Hum. Evol.* **49**, 316-334 (2005).
6. Pearson, O. M., Royer, D. F., Grine, F. E., & Fleagle, J. G. A description of the Omo I postcranial skeleton, including newly discovered fossils. *J. Hum. Evol.* **55**, 421-437 (2008).
7. DeSilva, J., McNutt, E., Benoit, J. & Zipfel, B. One small step: A review of Plio-Pleistocene hominin foot evolution. *Am. J. Phys. Anthropol.* **168**, 63–140 (2019).
8. Guérin, G., *et al.* A multi-method luminescence dating of the Palaeolithic sequence of La Ferrassie based on new excavations adjacent to the La Ferrassie 1 and 2 skeletons. *J. Archaeol. Sci.* **58**, 147-166 (2015).
9. Jungers, W. L. *et al.* The foot of Homo floresiensis. *Nature* **459**, 81–84 (2009).
10. Prang, T. C. Reevaluating the functional implications of *Australopithecus afarensis* navicular morphology. *J. Hum. Evol.* **97**, 73–85 (2016).
11. Harcourt-Smith, W. H. E. *et al.* The foot of Homo naledi. *Nat. Commun.* **6**, 1–8 (2015).
12. Sarmiento, E. E. & Marcus, L. F. The os navicular of humans, great apes, OH 8, Hadar, and Oreopithecus: Function, phylogeny, and multivariate analyses. *Am. Museum Novit.* **2000**, 1–38 (2000).
13. Clarke, R. J. & Tobias, P.V. Sterkfontein Member 2 foot bones of the oldest South African hominid. *Science* **269**, 521-524 (1995).
14. Granger, D. E., *et al.* New cosmogenic burial ages for Sterkfontein Member 2 Australopithecus and Member 5 Oldowan. *Nature* **522**, 85-88 (2015).
